# Supplementary material
Source: PubMed Central journal article supplement (PMC4873454)
Supplement: NIHMS778421-supplement-1.pdf [file NIHMS778421-supplement-1.pdf]

| Antibody or Inhibitor                          | target                                                                                                                              | vendor                           | catalog number |
|------------------------------------------------|-------------------------------------------------------------------------------------------------------------------------------------|----------------------------------|----------------|
| <b>INHIBITORS:</b>                             |                                                                                                                                     |                                  |                |
| SB203580                                       | inhibitor of p38 MAP kinase                                                                                                         | EMD Chemicals, Inc.              | 559389         |
| SP600125                                       | inhibitor of c-Jun N-terminal kinase (JNK)                                                                                          | EMD Chemicals, Inc.              | 420119         |
| IKK inhibitor VII                              | inhibitor of IKK                                                                                                                    | EMD Chemicals, Inc.              | 401486         |
| AG 879                                         | Etik inhibitor (as well as inhibitor of NGF-dependnet p140 c-trk tyrosine phosphorylation)                                          | EMD Chemicals, Inc.              | 658460         |
| LY294002                                       | P13-kinase inhibitor                                                                                                                | EMD Chemicals, Inc.              | 440204         |
| PP1                                            | Src inhibitor                                                                                                                       | EMD Chemicals, Inc.              | 567809         |
| PP2                                            | Src inhibitor                                                                                                                       | EMD Chemicals, Inc.              | 529573         |
| UO126                                          | inhibitor of MEK1 and MEK2 (Erk1/2)                                                                                                 | Cell Signaling, Inc.             | 9903           |
| IPA3                                           | PAK1 inhibitor                                                                                                                      | Tocris Biosciences               | 3622           |
| myristolated-PKI amide (14-22)                 | PKA inhibitor                                                                                                                       | Tocris Biosciences               | 2546           |
| Rp-cAMP                                        | PKA inhibitor                                                                                                                       | Santa-Cruz Biotechnology, Inc.   | sc-24010       |
| H-89                                           | PKA inhibitor. Also inhibits CaM kinase II, casein kinase I, Rsk-2, MSK1, MYLK, Akt1, PKC $\mu$ , Rock-2 and p70 S6 kinase $\alpha$ | Santa-Cruz Biotechnology, Inc.   | sc-3537        |
| 4-cyano-3 methylisoquinoline (4C3MQ)           | PKA inhibitor                                                                                                                       | Toronto Research Chemicals, Inc. | A150525        |
| Canertinib (CI-1033)                           | pan-ErbB tyrosine kinase inhibitor                                                                                                  | Sigma-Aldrich                    | C7249          |
| STI 571 (imatinib mesylate)                    | inhibitor of Bcr/c-Abl kinase                                                                                                       | Sigma-Aldrich                    | SML 1027       |
| <b>ANTIBODIES:</b>                             |                                                                                                                                     |                                  |                |
| $\alpha$ Bmx/Etk (H-220)                       | Bmx/Etk                                                                                                                             | Santa Cruz Biotechnology, Inc.   | sc-20711       |
| myc (9E10)                                     | c-Myc tag                                                                                                                           | Santa Cruz Biotechnology, Inc.   | sc-40          |
| $\alpha$ GPR30 (GPER1), (N-15)                 | G protein receptor 30 (GPR30)                                                                                                       | Santa Cruz Biotechnology, Inc.   | sc-48525-R     |
| $\alpha$ G $\beta$ (T-20)                      | $\beta$ subunit of G protein                                                                                                        | Santa Cruz Biotechnology, Inc.   | sc-378         |
| $\alpha$ ER $\alpha$ (HC-20)                   | estrogen receptor $\alpha$                                                                                                          | Santa Cruz Biotechnology, Inc.   | sc-543         |
| $\alpha$ IkB- $\alpha$ (C-15)                  | IkB- $\alpha$                                                                                                                       | Santa Cruz Biotechnology, Inc.   | sc-203         |
| $\alpha$ HA. 11                                | CYPYDVPDYASL (HA) sequence                                                                                                          | Covance                          | MMS-101R       |
| $\alpha$ PY (clone 4G10)                       | phospho-Tyr                                                                                                                         | EMD Millipore                    | #05-321X       |
| $\alpha$ tubulin                               | y tubulin                                                                                                                           | Sigma-Aldrich                    | T5326          |
| $\alpha$ GFP                                   | GFP, EGFP, YFP, EYFP, CFP                                                                                                           | Thermo Fisher Scientific         | MA5-15256      |
| $\alpha$ phospho-ER $\alpha$ (Ser305) (16J4)   | phospho-Ser305 of estrogen receptor $\alpha$                                                                                        | Bethyl Lab, Inc.                 | A300-598A      |
| $\alpha$ JAK2 (D2E12)                          | JAK2                                                                                                                                | Cell Signaling Technology, Inc.  | #3230          |
| $\alpha$ PAK1                                  | PAK1                                                                                                                                | Cell Signaling Technology, Inc.  | #2602          |
| $\alpha$ pPAK1 (Thr423)/PAK2(Thr402)           | phospho-Thr423 in PAK1 and phospho-Thr402 in PAK1                                                                                   | Cell Signaling Technology, Inc.  | #2601          |
| $\alpha$ $\beta$ PIX                           | Cool1/ $\beta$ PIX                                                                                                                  | Cell Signaling Technology, Inc.  | #4515          |
| $\alpha$ phospho-p38 (Thr180/Tyr182)           | phospho-Thr180/Tyr182 of p38                                                                                                        | Cell Signaling Technology, Inc.  | #4631          |
| $\alpha$ p38 MAPK                              | p38 MAP kinase                                                                                                                      | Cell Signaling Technology, Inc.  | #9212          |
| $\alpha$ phospho-SAPK/JNK (Thr183/Tyr185) (G9) | phospho-Thr183/Tyr185 of SAPK/JNK                                                                                                   | Cell Signaling Technology, Inc.  | #9255          |
| $\alpha$ SAPK/JNK (56G8)                       | SAPK/JNK                                                                                                                            | Cell Signaling Technology, Inc.  | #9258          |
| $\alpha$ phospho-p44/42 MAPK (Thr202/Tyr204)   | phospho-Thr202/Tyr204 of p44/42 MAPK                                                                                                | Cell Signaling Technology, Inc.  | #9106          |
| $\alpha$ p44/42 MAPK                           | p44/42 MAPK (Erk 1/2)                                                                                                               | Cell Signaling Technology, Inc.  | #4695          |
| $\alpha$ Src (32G6)                            | Src                                                                                                                                 | Cell Signaling Technology, Inc.  | #2123          |
| $\alpha$ phospho-ER $\alpha$ (Ser118) (16J4)   | phospho-Ser118 of estrogen receptor $\alpha$                                                                                        | Cell Signaling Technology, Inc.  | #2511          |
| $\alpha$ phospho-Akt (Ser473) (D9E)            | phospho-Ser473 of Akt                                                                                                               | Cell Signaling Technology, Inc.  | #4060          |
| $\alpha$ Akt (C67E7)                           | pan Akt                                                                                                                             | Cell Signaling Technology, Inc.  | #9272          |
